# Supplementary material for: Mucosal-Associated Invariant T (MAIT) Cells Are Impaired in Th17 Associated Primary and Secondary Immunodeficiencies
Source: PubMed Central journal article supplement (PMC4864289; doi:10.1371/journal.pone.0155059), 2016-05-11

Supplementary Figure 1

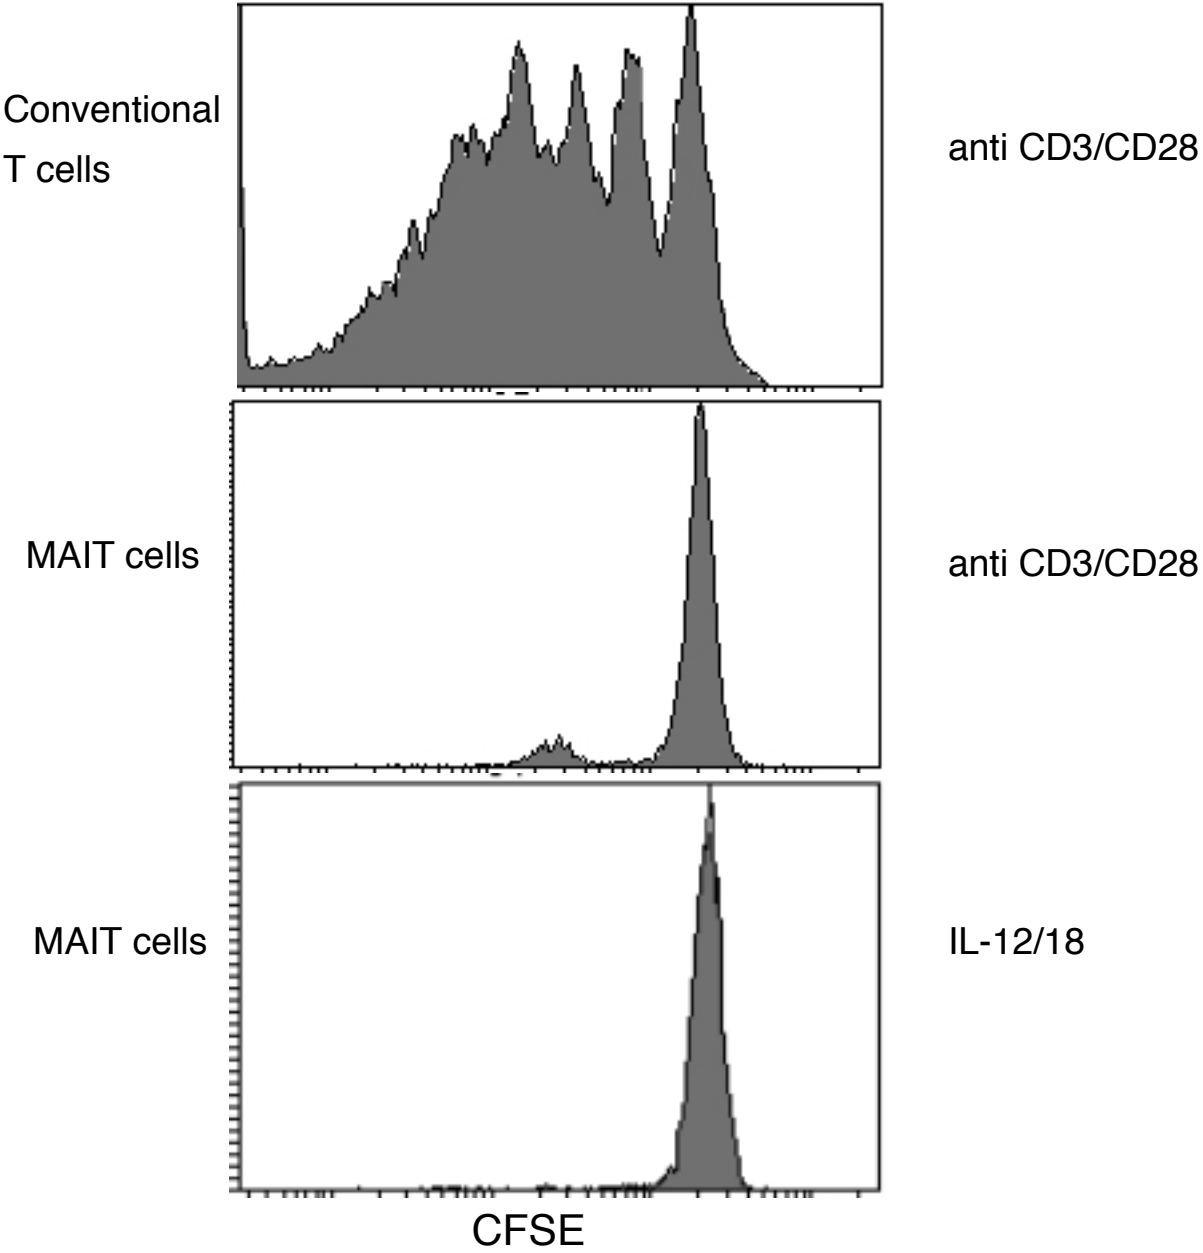

Supplement: pone.0155059.s001.pdf [file pone.0155059.s001.pdf]
